# Supplementary material
Source: PubMed Central journal article supplement (PMC4559497)

**Supplemental Table 1: Primary vs sensitivity definitions for ascertainment of CKD Stage 3**

| Criterion                                                                                  | Ascertainment of CKD                                       |             |   |                                                               |    |
|--------------------------------------------------------------------------------------------|------------------------------------------------------------|-------------|---|---------------------------------------------------------------|----|
|                                                                                            | Primary                                                    | Sensitivity |   |                                                               |    |
|                                                                                            |                                                            | 1           | 2 | 3                                                             | 4  |
| 1. Number of eGFR < 60 ml/min per 1.73m <sup>2</sup>                                       | 2                                                          | 2           | 2 | 2                                                             | 1  |
| 2. Include if died after reaching first eGFR < 60                                          | Y                                                          | Y           | Y | Need to reach 45 ml/min per 1.73m <sup>2</sup> prior to death | NA |
| 3. Include if participant reached eGFR <60 ml/min per 1.73m <sup>2</sup> at the last visit | Need to reach 45 ml/min per 1.73m <sup>2</sup> if last GFR | Y           | N | Need to reach 45 ml/min per 1.73m <sup>2</sup> if last GFR    | NA |
| 4. Include if developed ESRD regardless of baseline eGFR                                   | Y                                                          | Y           | Y | Y                                                             | Y  |

CKD, chronic kidney disease; eGFR, estimated glomerular filtration rate; ESRD, end stage renal disease; Y, yes; N, no; NA, not applicable

**Supplemental Table 2: Characteristics of patients included vs excluded**

|                                              | <b>Total<br/>N=4560</b> | <b>Not included<br/>N = 672, 14.7%</b> | <b>Included<br/>N = 3888, 85.3%</b> | <b><i>p</i></b> |
|----------------------------------------------|-------------------------|----------------------------------------|-------------------------------------|-----------------|
| Age (years) , mean (SD)                      | 46.9 (7.0)              | 49.6 (7.1)                             | 46.5 (6.9)                          | <.0001          |
| Male, n (%)                                  | 2195 (48.1)             | 295 (43.9)                             | 1900 (48.9)                         | 0.02            |
| Smoking status                               |                         |                                        |                                     |                 |
| Never smoked                                 | 1411 (31.0)             | 168 (25.0)                             | 1243 (32.0)                         | <.0001          |
| Past smoker                                  | 644 (14.1)              | 81 (12.1)                              | 563 (14.5)                          |                 |
| Current smoker                               | 2504 (54.9)             | 422 (62.9)                             | 2082 (53.6)                         |                 |
| Diabetes, n (%)                              | 76 (1.7)                | 14 (2.1)                               | 62 (1.6)                            | 0.35            |
| Hypertension, n (%)                          | 2003 (44)               | 365 (55)                               | 1638 (42)                           | <.0001          |
| History of cardiovascular disease, n (%)     | 3 (0.1)                 | 1 (0.2)                                | 2 (0.1)                             | 0.36            |
| Proteinuria, n (%)                           | 55 (1.3)                | 16 (2.6)                               | 39 (1.1)                            | 0.002           |
| eGFR (mL/min/1.73m <sup>2</sup> ), mean (SD) | 88.8 (13.8)             | 85.2 (17.0)                            | 89.4 (13.1)                         | <.0001          |
| Cholesterol (mg/dL), mean (SD)               | 257.4 (46.9)            | 265.4 (50.5)                           | 256.0 (46.1)                        | <.0001          |
| Systolic blood pressure (mmHg), mean (SD)    | 135.1 (18.2)            | 139.9 (21.3)                           | 134.2 (17.5)                        | <.0001          |
| Diastolic blood pressure (mmHg), mean (SD)   | 85.7 (10.4)             | 87.7 (11.6)                            | 85.4 (10.1)                         | <.0001          |
| Triglycerides (mg/dL), mean (SD)             | 88.2 (42.7)             | 93.7 (45.3)                            | 87.2 (42.2)                         | 0.001           |
| BMI (kg/m <sup>2</sup> ), mean (SD)          | 25.0 (3.7)              | 24.9 (4.1)                             | 25.1 (3.7)                          | 0.34            |
| Fasting blood sugar (mg/dL), mean (SD)       | 81.6 (12.3)             | 82.4 (12.2)                            | 81.5 (12.3)                         | 0.068           |

eGFR, estimated glomerular filtration rate; BMI, body mass index

**Supplemental Table 3: Comparison of characteristics of participants identified with CKD by the different definitions**

|                                                                          | Primary      | Sensitivity     |                |                |                 |
|--------------------------------------------------------------------------|--------------|-----------------|----------------|----------------|-----------------|
|                                                                          | (N = 727)    | 1<br>(N = 1143) | 2<br>(N = 623) | 3<br>(N = 548) | 4<br>(N = 1457) |
| Age at first event (years), mean (SD)                                    | 69.6 (9.1)   | 71.9 (8.9)      | 68.3 (8.8)     | 68.6 (9.4)     | 69.3 (9.9)      |
| Time to first event (years)(median, 25 <sup>th</sup> -75 <sup>th</sup> ) | 20 (13, 26)  | 25 (16, 34)     | 18 (12, 25)    | 19 (13, 26)    | 20 (12, 34)     |
| Male, n (%)                                                              | 257 (35.4)   | 431 (37.7)      | 216 (34.7)     | 174 (31.8)     | 523 (35.9)      |
| Smoking status, n (%)                                                    |              |                 |                |                |                 |
| Never smoked                                                             | 264 (36.3)   | 413 (36.1)      | 231 (37.1)     | 217 (39.6)     | 549 (37.7)      |
| Past smoker                                                              | 121 (16.6)   | 188 (16.5)      | 101 (16.2)     | 93 (17.0)      | 236 (16.2)      |
| Current smoker                                                           | 342 (47.0)   | 542 (47.4)      | 291 (46.7)     | 238 (43.4)     | 672 (46.1)      |
| Diabetes, n (%)                                                          | 15 (2.1)     | 17 (1.5)        | 14 (2.3)       | 10 (1.8)       | 22 (1.5)        |
| Hypertension, n (%)                                                      | 376 (51.7)   | 534 (46.7)      | 336 (53.9)     | 274 (50.0)     | 690 (47.4)      |
| History of cardiovascular disease, n (%)                                 | 0 (0)        | 0 (0)           | 0 (0)          | 0 (0)          | 0 (0)           |
| Proteinuria, n (%)                                                       | 13 (1.9)     | 15 (1.4)        | 13 (2.2)       | 10 (1.9)       | 19 (1.4)        |
| eGFR (mL/min/1.73m <sup>2</sup> ), mean (SD)                             | 81.9 (12.5)  | 84.0 (12.8)     | 80.5 (11.9)    | 80.9 (12.6)    | 83.3 (12.5)     |
| Cholesterol (mg/dL), mean (SD)                                           | 264.6 (47.1) | 260.1 (46.1)    | 266.4 (47.4)   | 262.2 (46.0)   | 260.5 (46.2)    |
| Systolic blood pressure (mmHg), mean (SD)                                | 138.4 (19.4) | 136.3 (18.4)    | 139.2 (19.5)   | 138.3 (20.0)   | 136.6 (18.9)    |
| Diastolic blood pressure (mmHg), mean (SD)                               | 87.7 (10.8)  | 86.5 (10.4)     | 88.1 (10.7)    | 87.7 (11.4)    | 86.6 (10.5)     |
| Triglycerides (mg/dL), mean (SD)                                         | 91.4 (41.9)  | 89.0 (41.8)     | 90.9 (42.2)    | 89.4 (40.8)    | 88.7 (42.1)     |
| BMI (kg/m <sup>2</sup> ), mean (SD)                                      | 25.7 (3.9)   | 25.4 (3.7)      | 25.6 (4.0)     | 25.7 (4.0)     | 25.3 (3.7)      |
| Fasting blood sugar (mg/dL), mean (SD)                                   | 81.0 (14.3)  | 80.9 (13.0)     | 81.1 (13.9)    | 80.4 (15.1)    | 81.0 (12.4)     |
| eGFR slope (ml/min per 1.73m <sup>2</sup> /year), mean (SD)              | 0.91 (0.19)  | 0.87 (0.18)     | 0.89 (0.19)    | 0.92 (0.20)    | 0.84 (0.19)     |

eGFR, estimated glomerular filtration rate; BMI, body mass index

Sensitivity: 1 = requires two consecutive measurements of eGFR < 60 ml/min/1.73m<sup>2</sup> or one measurement of eGFR < 60 ml/min/1.73m<sup>2</sup> if it was at the last measurement of eGFR due to death or lack of subsequent creatinine measurement or ESRD. 2 = requires eGFR < 60 ml/min/1.73m<sup>2</sup> on two occasions or eGFR < 60 ml/min/1.73m<sup>2</sup> on the first measurement if the participant died prior to the second measurement or ESRD. 3 = requires eGFR < 60 ml/min/1.73m<sup>2</sup> on two occasions or one eGFR < 45 ml/min/1.73m<sup>2</sup> if it was at the last measurement of eGFR due to death or lack of subsequent creatinine measurement or ESRD. 4 = requires only one measurement of eGFR < 60 ml/min/1.73m<sup>2</sup> irrespective of the results of follow up measurements and was used for comparison to previous reports or ESRD.

**Supplemental Table 4: Cumulative risk of incident CKD Stage 3 and higher unadjusted for death**

| Age (years)  | Years from baseline age* |                   |                   |                   |                   |
|--------------|--------------------------|-------------------|-------------------|-------------------|-------------------|
|              | 5-Year                   | 10-Year           | 20-Year           | 30-Year           | 40-Year           |
| <b>Women</b> |                          |                   |                   |                   |                   |
| 45           | 0.8 (0.3, 1.3)           | 2.0 (1.3, 2.8)    | 8.0 (6.7, 9.3)    | 21.5 (19.4, 23.6) | 41.4 (37.6, 45.2) |
| 55           | 2.0 (1.4, 2.7)           | 6.1 (5.0, 7.2)    | 19.9 (17.9, 22.0) | 40.2 (36.4, 44.1) |                   |
| 65           | 5.4 (4.3, 6.5)           | 14.7 (12.8, 16.6) | 36.3 (32.3, 40.4) |                   |                   |
| 75           | 10.3 (8.0, 12.6)         | 25.4 (21.0, 29.8) |                   |                   |                   |
| 80           | 16.8 (12.4, 21.2)        | 33.3 (24.9, 41.8) |                   |                   |                   |
| <b>Men</b>   |                          |                   |                   |                   |                   |
| 45           | 0.2 (0, 0.5)             | 1.4 (0.8, 2.0)    | 4.7 (3.6, 5.8)    | 13.9 (11.9, 15.9) | 28.0 (24.3, 31.6) |
| 55           | 1.2 (0.7, 1.7)           | 3.3 (2.4, 4.3)    | 12.7 (10.8, 14.6) | 27.0 (23.3, 30.6) |                   |
| 65           | 2.8 (1.9, 3.7)           | 9.7 (7.9, 11.5)   | 24.4 (20.7, 28.2) |                   |                   |
| 75           | 8.5 (6.3, 10.7)          | 16.3 (12.6, 20.1) |                   |                   |                   |
| 80           | 8.6 (5.1, 12.1)          | 13.7 (8.1, 19.4)  |                   |                   |                   |

\*Cumulative risk shown as percentage (95% CI)

Cumulative risk not determined for missing cells due to the small number of events

**Supplemental Table 5: Lifetime risk for incident CKD Stage 3 and higher by subgroups of eGFR**

| Age(years)                                         | Years from baseline age* |                   |                   |                   |                   |
|----------------------------------------------------|--------------------------|-------------------|-------------------|-------------------|-------------------|
|                                                    | 5-Year                   | 10-Year           | 20-Year           | 30-Year           | 40-Year           |
| <b>Women</b>                                       |                          |                   |                   |                   |                   |
| <b>eGFR &lt; 75 (ml/min per 1.73m<sup>2</sup>)</b> |                          |                   |                   |                   |                   |
| 45                                                 | 4.5 (0.9, 8.1)           | 8.0 (3.9, 12.2)   | 22.7 (17.8, 27.7) | 41.7 (36.3, 47.1) | 55.7 (49.7, 61.6) |
| 55                                                 | 5.5 (3.0, 8.1)           | 16.3 (12.3, 20.2) | 37.3 (32.0, 42.7) | 52.8 (46.5, 59.1) |                   |
| 65                                                 | 13.1 (9.2, 17.1)         | 25.6 (20.2, 30.9) | 44.3 (37.3, 51.3) |                   |                   |
| 75                                                 | 16.3 (9.8, 22.8)         | 27.4 (18.9, 35.9) |                   |                   |                   |
| 80                                                 | 14.8 (6.5, 23.1)         | 24.6 (13.5, 35.7) |                   |                   |                   |
| <b>eGFR 75-90 (ml/min per 1.73m<sup>2</sup>)</b>   |                          |                   |                   |                   |                   |
| 45                                                 | 0.7 (0, 1.5)             | 1.7 (0.6, 2.8)    | 7.0 (5.1, 8.8)    | 20.5 (17.6, 23.5) | 34.4 (30.1, 38.6) |
| 55                                                 | 2.1 (1.1, 3.1)           | 5.4 (3.8, 7.0)    | 19.3 (16.4, 22.3) | 33.5 (29.2, 37.9) |                   |
| 65                                                 | 5.4 (3.7, 7.1)           | 15.3 (12.5, 18.2) | 30.9 (26.3, 35.5) |                   |                   |
| 75                                                 | 7.0 (4.4, 9.7)           | 20.2 (15.0, 25.3) |                   |                   |                   |
| 80                                                 | 15.2 (9.9, 20.5)         | 26.8 (18.2, 35.4) |                   |                   |                   |
| <b>eGFR &gt; 90 (ml/min per 1.73m<sup>2</sup>)</b> |                          |                   |                   |                   |                   |
| 45                                                 | 0 (0, 0)                 | 0.5 (0, 1.0)      | 1.6 (0.6, 2.5)    | 7.5 (5.2, 9.9)    | 25.4 (19.0, 31.8) |
| 55                                                 | 0.2 (0, 0.4)             | 1.1 (0.3, 1.9)    | 7.2 (4.8, 9.5)    | 25.3 (18.8, 31.8) |                   |
| 65                                                 | 1.3 (0.3, 2.2)           | 6.3 (4.0, 8.6)    | 25.1 (18.4, 31.8) |                   |                   |
| 75                                                 | 11.1 (6.8, 15.4)         | 21.9 (14.4, 29.4) |                   |                   |                   |
| 80                                                 | 14.0 (5.6, 22.5)         | 21.1 (9.0, 33.2)  |                   |                   |                   |
| <b>Men</b>                                         |                          |                   |                   |                   |                   |
| <b>eGFR &lt; 75 (ml/min per 1.73m<sup>2</sup>)</b> |                          |                   |                   |                   |                   |
| 45                                                 | 0 (0, 0)                 | 10.0 (4.6, 15.4)  | 19.1 (12.6, 25.7) | 26.9 (19.7, 34.1) | 37.7 (29.2, 46.3) |
| 55                                                 | 4.4 (0.9, 7.9)           | 10.4 (5.3, 15.4)  | 19.3 (12.6, 25.9) | 31.6 (22.8, 40.5) |                   |
| 65                                                 | 2.6 (0, 5.4)             | 10.5 (4.9, 16.1)  | 25.1 (15.9, 34.4) |                   |                   |
| 75                                                 | 12.2 (4.6, 19.8)         | 19.6 (9.0, 30.2)  |                   |                   |                   |
| 80                                                 | 10.5 (0, 21.7)           | 10.5 (0, 21.7)    |                   |                   |                   |
| <b>eGFR 75-90 (ml/min per 1.73m<sup>2</sup>)</b>   |                          |                   |                   |                   |                   |
| 45                                                 | 0.5 (0, 1.2)             | 1.2 (0.2, 2.2)    | 5.7 (3.8, 7.6)    | 16.6 (13.4, 19.8) | 24.9 (20.8, 29)   |
| 55                                                 | 1.7 (0.7, 2.7)           | 4.7 (2.9, 6.4)    | 16.1 (12.9, 19.4) | 24.8 (20.6, 29.0) |                   |
| 65                                                 | 4.5 (2.6, 6.4)           | 13.2 (9.9, 16.5)  | 23.1 (18.5, 27.7) |                   |                   |
| 75                                                 | 9.1 (5.4, 12.8)          | 13.5 (8.6, 18.3)  |                   |                   |                   |
| 80                                                 | 6.2 (1.6, 10.8)          | 9.9 (3.1, 16.7)   |                   |                   |                   |
| <b>eGFR &gt; 90 (ml/min per 1.73m<sup>2</sup>)</b> |                          |                   |                   |                   |                   |
| 45                                                 | 0.1 (0, 0.4)             | 0.3 (0, 0.6)      | 1.3 (0.5, 2.0)    | 6.2 (4.4, 8.1)    | 15.6 (12.2, 19.0) |
| 55                                                 | 0.3 (0, 0.7)             | 1.0 (0.4, 1.7)    | 6.1 (4.3, 7.9)    | 15.7 (12.2, 19.2) |                   |
| 65                                                 | 1.6 (0.7, 2.5)           | 5.7 (3.8, 7.6)    | 16.4 (12.6, 20.2) |                   |                   |
| 75                                                 | 6.7 (4.0, 9.4)           | 13.1 (8.9, 17.2)  |                   |                   |                   |
| 80                                                 | 7.6 (3.6, 11.6)          | 10.7 (5.5, 15.9)  |                   |                   |                   |

eGFR, estimated glomerular rate\* Risk shown as percentage (95% CI). Cumulative risk not determined for missing cells due to the small number of events

Lifetime risk estimates are adjusted for competing risk of death

**Supplemental Table 6: Lifetime risk for Incident CKD Stage 3 and higher by subgroups of Hypertension**

| Age<br>(years)         | Years from baseline age* |                   |                   |                   |                   |
|------------------------|--------------------------|-------------------|-------------------|-------------------|-------------------|
|                        | 5-Year                   | 10-Year           | 20-Year           | 30-Year           | 40-Year           |
| <b>Women</b>           |                          |                   |                   |                   |                   |
| <b>No Hypertension</b> |                          |                   |                   |                   |                   |
| 45                     | 0.9 (0.2, 1.5)           | 1.7 (0.9, 2.6)    | 6.5 (5.0, 8.0)    | 16.9 (14.5, 19.4) | 32.3 (28.1, 36.5) |
| 55                     | 1.9 (1.1, 2.8)           | 4.9 (3.6, 6.2)    | 15.7 (13.2, 18.1) | 31.5 (27.2, 35.8) |                   |
| 65                     | 3.6 (2.4, 4.8)           | 11.6 (9.3, 13.9)  | 28.7 (24.1, 33.3) |                   |                   |
| 75                     | 9.8 (6.9, 12.8)          | 20.9 (15.8, 26.0) |                   |                   |                   |
| 80                     | 13.3 (8.0, 18.7)         | 21.2 (13.3, 29)   |                   |                   |                   |
| <b>Hypertension</b>    |                          |                   |                   |                   |                   |
| 45                     | 0.7 (0, 1.7)             | 2.5 (1.1, 4.0)    | 9.9 (7.5, 12.2)   | 25.2 (21.9, 28.6) | 40.3 (35.9, 44.7) |
| 55                     | 2.1 (1.0, 3.2)           | 7.6 (5.6, 9.5)    | 23.4 (20.2, 26.7) | 39 (34.5, 43.5)   |                   |
| 65                     | 7.9 (5.7, 10.0)          | 17.8 (14.6, 20.9) | 35.2 (30.3, 40.0) |                   |                   |
| 75                     | 10.2 (6.8, 13.7)         | 23.5 (17.9, 29.1) |                   |                   |                   |
| 80                     | 16.7 (10.8, 22.6)        | 28.0 (19.7, 36.4) |                   |                   |                   |
| <b>Men</b>             |                          |                   |                   |                   |                   |
| <b>No Hypertension</b> |                          |                   |                   |                   |                   |
| 45                     | 0.3 (0, 0.7)             | 1.2 (0.5, 2)      | 3.6 (2.4, 4.9)    | 9.2 (7.2, 11.2)   | 18.9 (15.4, 22.3) |
| 55                     | 0.4 (0, 0.9)             | 2.5 (1.5, 3.5)    | 8.2 (6.3, 10.2)   | 18.3 (14.8, 21.8) |                   |
| 65                     | 1.9 (0.9, 2.9)           | 6.4 (4.5, 8.3)    | 17.5 (13.7, 21.2) |                   |                   |
| 75                     | 6.6 (4.1, 9.1)           | 13.4 (9.4, 17.5)  |                   |                   |                   |
| 80                     | 8.4 (4.3, 12.5)          | 11.6 (6.2, 16.9)  |                   |                   |                   |
| <b>Hypertension</b>    |                          |                   |                   |                   |                   |
| 45                     | 0.2 (0, 0.6)             | 1.6 (0.6, 2.6)    | 5.6 (3.9, 7.3)    | 15.7 (12.8, 18.6) | 24.3 (20.6, 28.1) |
| 55                     | 2.2 (1.1, 3.3)           | 4.2 (2.7, 5.7)    | 14.8 (11.9, 17.7) | 23.9 (20.0, 27.7) |                   |
| 65                     | 3.9 (2.3, 5.6)           | 12.4 (9.4, 15.4)  | 23.1 (18.8, 27.3) |                   |                   |
| 75                     | 10.5 (6.7, 14.3)         | 14.8 (10.1, 19.5) |                   |                   |                   |
| 80                     | 6 (1.9, 10.1)            | 8.5 (3.2, 13.8)   |                   |                   |                   |

\*Risk shown as percentage (95% CI). Risk not determined for missing cells due to the small number of events

Lifetime risk estimates are adjusted for competing risk of death

**Supplemental Table 7: Lifetime risk for Incident CKD Stage 3 and higher by subgroups of BMI\***

| Age<br>(years)                          | Years from baseline age* |                   |                   |                   |                   |
|-----------------------------------------|--------------------------|-------------------|-------------------|-------------------|-------------------|
|                                         | 5-Year                   | 10-Year           | 20-Year           | 30-Year           | 40-Year           |
| <b>Women</b>                            |                          |                   |                   |                   |                   |
| <b>BMI &lt; 25 (kg/m<sup>2</sup>)</b>   |                          |                   |                   |                   |                   |
| 45                                      | 0.9 (0.2, 1.6)           | 1.8 (0.9, 2.7)    | 6.3 (4.8, 7.8)    | 17.9 (15.4, 20.3) | 32.5 (28.6, 36.4) |
| 55                                      | 1.8 (1, 2.6)             | 4.6 (3.4, 5.8)    | 16.5 (14.1, 18.9) | 31.6 (27.6, 35.6) |                   |
| 65                                      | 4.8 (3.5, 6.2)           | 12.9 (10.6, 15.1) | 29.1 (24.9, 33.3) |                   |                   |
| 75                                      | 9 (6.2, 11.7)            | 20.4 (15.6, 25.2) |                   |                   |                   |
| 80                                      | 13.9 (8.9, 18.9)         | 17.0 (11.0, 23.0) |                   |                   |                   |
| <b>BMI 25-&lt;30 (kg/m<sup>2</sup>)</b> |                          |                   |                   |                   |                   |
| 45                                      | 0.7 (0, 1.7)             | 2.3 (0.8, 3.8)    | 10.1 (7.5, 12.8)  | 22.8 (19.1, 26.6) | 37.6 (32.3, 42.8) |
| 55                                      | 2.2 (0.9, 3.5)           | 8.1 (5.8, 10.5)   | 21.3 (17.6, 25.0) | 36.6 (31.2, 42.0) |                   |
| 65                                      | 5.6 (3.5, 7.8)           | 14.8 (11.3, 18.2) | 31.9 (26.1, 37.6) |                   |                   |
| 75                                      | 10.4 (6.4, 14.5)         | 21.8 (15.4, 28.2) |                   |                   |                   |
| 80                                      | 13.8 (7.4, 20.2)         | 31.9 (21.3, 42.4) |                   |                   |                   |
| <b>BMI ≥ 30 (kg/m<sup>2</sup>)</b>      |                          |                   |                   |                   |                   |
| 45                                      | 0 (0, 0)                 | 2.5 (0, 5.3)      | 10.8 (5.6, 16)    | 30.1 (22.1, 38.1) | 53.8 (42.2, 65.3) |
| 55                                      | 2.2 (0, 4.7)             | 8.5 (3.9, 13.2)   | 28.3 (20.3, 36.3) | 52.6 (40.7, 64.5) |                   |
| 65                                      | 8.4 (3.4, 13.5)          | 22.3 (14.2, 30.5) | 49.7 (36.6, 62.9) |                   |                   |
| 75                                      | 16.9 (6.6, 27.2)         | 38.3 (21.6, 55.0) |                   |                   |                   |
| 80                                      | 30.6 (10.0, 51.1)        | 39.4 (15.9, 63.0) |                   |                   |                   |
| <b>Men</b>                              |                          |                   |                   |                   |                   |
| <b>BMI &lt; 25 (kg/m<sup>2</sup>)</b>   |                          |                   |                   |                   |                   |
| 45                                      | 0 (0, 0)                 | 0.6 (0, 1.2)      | 3.4 (2.0, 4.8)    | 9.7 (7.3, 12.1)   | 19.4 (15.4, 23.4) |
| 55                                      | 1.0 (0.3, 1.8)           | 2.9 (1.6, 4.1)    | 9.3 (6.9, 11.7)   | 19.3 (15.2, 23.4) |                   |
| 65                                      | 2.5 (1.2, 3.8)           | 7.2 (4.8, 9.5)    | 18.3 (13.9, 22.7) |                   |                   |
| 75                                      | 6.9 (3.8, 9.9)           | 14.2 (9.2, 19.1)  |                   |                   |                   |
| 80                                      | 9.2 (4.0, 14.4)          | 15.0 (7.6, 22.4)  |                   |                   |                   |
| <b>BMI 25-&lt;30 (kg/m<sup>2</sup>)</b> |                          |                   |                   |                   |                   |
| 45                                      | 0.3 (0, 0.8)             | 1.8 (0.8, 2.8)    | 4.8 (3.3, 6.3)    | 13.1 (10.6, 15.6) | 20.6 (17.2, 24.0) |
| 55                                      | 0.9 (0.2, 1.5)           | 3.1 (1.9, 4.3)    | 11.8 (9.3, 14.3)  | 19.7 (16.2, 23.1) |                   |
| 65                                      | 2.9 (1.6, 4.3)           | 9.9 (7.4, 12.5)   | 18.9 (15.1, 22.7) |                   |                   |
| 75                                      | 8.2 (5.1, 11.2)          | 11.4 (7.6, 15.2)  |                   |                   |                   |
| 80                                      | 4.2 (1.1, 7.3)           | 5.2 (1.6, 8.8)    |                   |                   |                   |
| <b>BMI ≥ 30 (kg/m<sup>2</sup>)</b>      |                          |                   |                   |                   |                   |
| 45                                      | 0.9 (0, 2.7)             | 2.5 (0, 5.2)      | 7.9 (3.4, 12.4)   | 17.5 (11.0, 24.0) | 31.8 (22.9, 40.7) |
| 55                                      | 3.5 (0.5, 6.5)           | 5.7 (1.8, 9.6)    | 15.8 (9.3, 22.2)  | 30.8 (21.6, 39.9) |                   |
| 65                                      | 2.9 (0, 6.1)             | 12.3 (5.8, 18.9)  | 30.8 (20.4, 41.2) |                   |                   |
| 75                                      | 14.2 (5.3, 23.1)         | 25.4 (12.8, 38.0) |                   |                   |                   |
| 80                                      | 15.7 (2.0, 29.4)         | 15.7 (2.0, 29.4)  |                   |                   |                   |

BMI, body mass index

\*Risk shown as percentage (95% CI). Risk not determined for missing cells due to the small number of events

Lifetime risk estimates are adjusted for competing risk of death

**Supplemental Table 8: Lifetime risk for Incident CKD Stage 3 and higher by subgroups of smoking**

|                       | Age (years)       |                   | Years from baseline age* |                   |                   |
|-----------------------|-------------------|-------------------|--------------------------|-------------------|-------------------|
|                       | 5-Year            | 10-Year           | 20-Year                  | 30-Year           | 40-Year           |
| <b>Women</b>          |                   |                   |                          |                   |                   |
| <b>Never smoked</b>   |                   |                   |                          |                   |                   |
|                       | <b>5-year</b>     | <b>10-year</b>    | <b>20-year</b>           | <b>30-year</b>    | <b>40-year</b>    |
| 45                    | 1.0 (0.1, 1.9)    | 2.6 (1.3, 3.9)    | 8.0 (6.1, 10.0)          | 22.2 (19.1, 25.2) | 36.4 (31.7, 41.1) |
| 55                    | 2.1 (1.1, 3.1)    | 5.6 (4.0, 7.2)    | 20.1 (17.2, 23.1)        | 34.8 (30.0, 39.6) |                   |
| 65                    | 5.9 (4.2, 7.7)    | 15.7 (12.9, 18.6) | 31.5 (26.5, 36.6)        |                   |                   |
| 75                    | 8.1 (5.1, 11.1)   | 19.9 (14.2, 25.5) |                          |                   |                   |
| 80                    | 14.0 (8.1, 19.9)  | 27.3 (17.9, 36.7) |                          |                   |                   |
| <b>Past Smoker</b>    |                   |                   |                          |                   |                   |
| 45                    | 0 (0, 0)          | 0.5 (0, 1.5)      | 9.3 (5.4, 13.2)          | 17.6 (12.3, 22.8) | 33.2 (25.0, 41.4) |
| 55                    | 2.0 (0, 3.8)      | 8.9 (5.1, 12.7)   | 17.4 (12.1, 22.6)        | 33.2 (24.9, 41.5) |                   |
| 65                    | 3.2 (0.7, 5.7)    | 9.4 (4.9, 13.8)   | 27 (18.3, 35.6)          |                   |                   |
| 75                    | 11.2 (4.8, 17.6)  | 21.0 (11.5, 30.5) |                          |                   |                   |
| 80                    | 11.4 (2.7, 20.2)  | 25.6 (11.0, 40.2) |                          |                   |                   |
| <b>Current smoker</b> |                   |                   |                          |                   |                   |
| 45                    | 0.8 (0, 1.6)      | 1.8 (0.7, 2.8)    | 7.2 (5.3, 9.1)           | 19.2 (16.2, 22.2) | 35.8 (31.2, 40.4) |
| 55                    | 1.9 (1.0, 2.9)    | 5.7 (4.0, 7.3)    | 18.1 (15.1, 21.0)        | 35.2 (30.5, 40.0) |                   |
| 65                    | 5.3 (3.6, 7.0)    | 13.7 (10.9, 16.6) | 32.8 (27.7, 37.9)        |                   |                   |
| 75                    | 11.7 (7.9, 15.4)  | 25 (19.0, 31.0)   |                          |                   |                   |
| 80                    | 17.4 (10.8, 24.0) | 21.1 (13.5, 28.7) |                          |                   |                   |
| <b>Men</b>            |                   |                   |                          |                   |                   |
| <b>Never smoked</b>   |                   |                   |                          |                   |                   |
| 45                    | 0.9 (0, 2.2)      | 2.4 (0.5, 4.2)    | 6.4 (3.6, 9.2)           | 11.9 (8.1, 15.7)  | 18.2 (12.7, 23.7) |
| 55                    | 1.3 (0, 2.5)      | 4.2 (2.0, 6.4)    | 9.9 (6.4, 13.5)          | 16.5 (11.1, 21.9) |                   |
| 65                    | 2.8 (0.7, 4.8)    | 6.5 (3.3, 9.7)    | 13.8 (8.1, 19.6)         |                   |                   |
| 75                    | 2.8 (0.1, 5.4)    | 8.8 (2.9, 14.6)   |                          |                   |                   |
| 80                    | 7 (0.9, 13.1)     | 13.5 (4.4, 22.5)  |                          |                   |                   |
| <b>Past smoker</b>    |                   |                   |                          |                   |                   |
| 45                    | 0.5 (0, 1.5)      | 1.7 (0, 3.4)      | 5.5 (2.8, 8.2)           | 15.1 (10.7, 19.5) | 29.2 (22.8, 35.6) |
| 55                    | 1.1 (0, 2.4)      | 3.9 (1.6, 6.2)    | 13.9 (9.5, 18.2)         | 28.5 (22.0, 35.0) |                   |
| 65                    | 2.9 (0.8, 5.1)    | 11.2 (7.0, 15.5)  | 27.7 (20.7, 34.7)        |                   |                   |
| 75                    | 12.2 (6.6, 17.8)  | 20.7 (12.9, 28.5) |                          |                   |                   |
| 80                    | 11.1 (3.6, 18.5)  | 11.1 (3.6, 18.5)  |                          |                   |                   |
| <b>Current smoker</b> |                   |                   |                          |                   |                   |
| 45                    | 0 (0, 0)          | 1.0 (0.4, 1.7)    | 3.6 (2.5, 4.8)           | 11.3 (9.1, 13.4)  | 19.7 (16.6, 22.9) |
| 55                    | 1.2 (0.5, 1.8)    | 2.7 (1.7, 3.7)    | 10.6 (8.5, 12.8)         | 19.5 (16.2, 22.7) |                   |
| 65                    | 2.7 (1.5, 3.8)    | 9.0 (6.9, 11.2)   | 19.1 (15.6, 22.6)        |                   |                   |
| 75                    | 8.7 (5.8, 11.6)   | 13.3 (9.4, 17.1)  |                          |                   |                   |
| 80                    | 6.1 (2.5, 9.8)    | 8.7 (3.6, 13.7)   |                          |                   |                   |

\*Risk shown as percentage (95% CI). Risk not determined for missing cells due to the small number of events

Lifetime risk estimates are adjusted for competing risk of death



**Supplemental Figure 1:** Lifetime risk for incident CKD Stage 3 and higher for men and women starting at age 45 for the four sensitivity methods for ascertainment of CKD. The methods are described in Supplement Table 1.

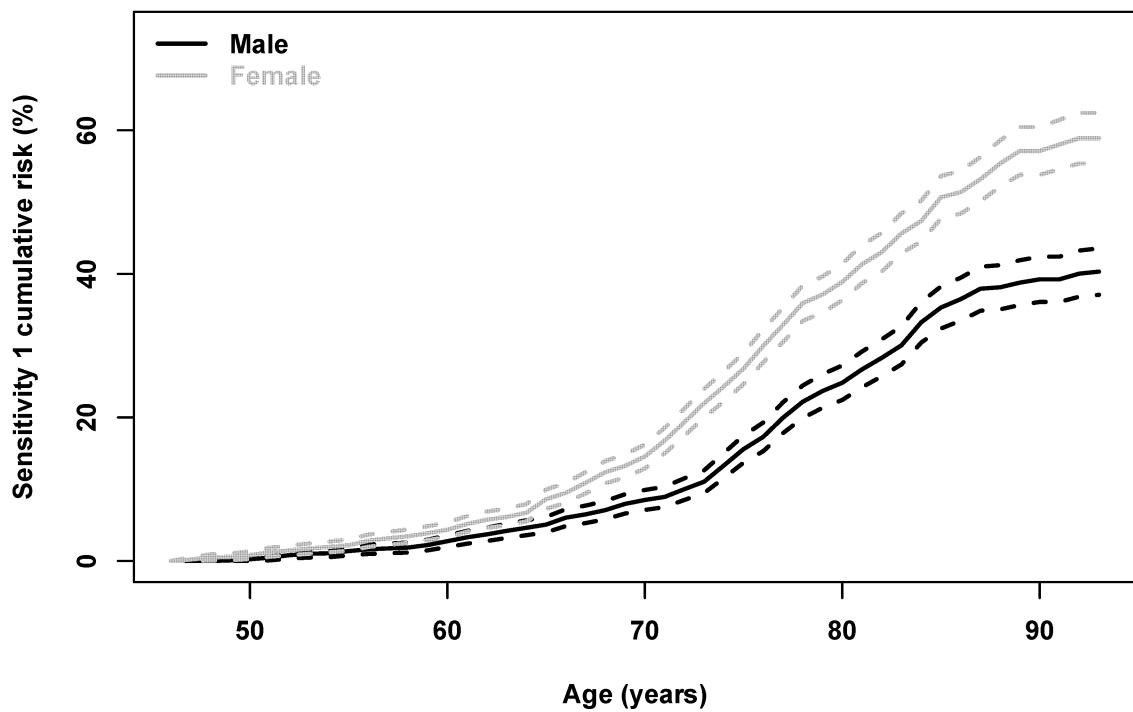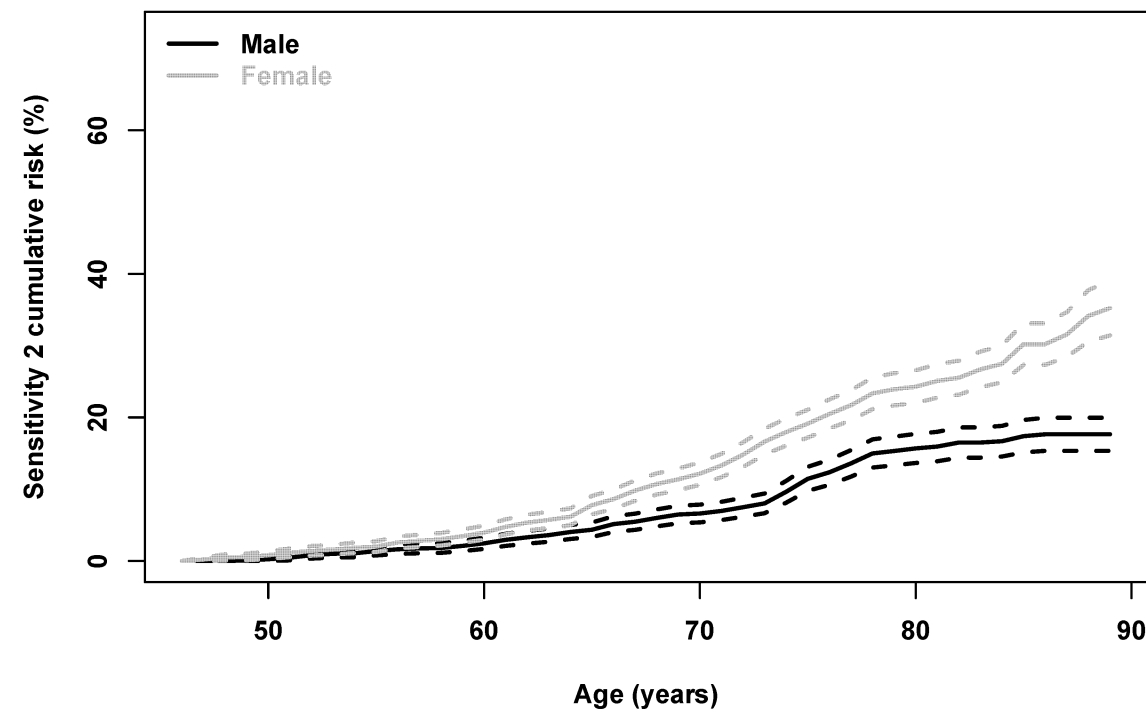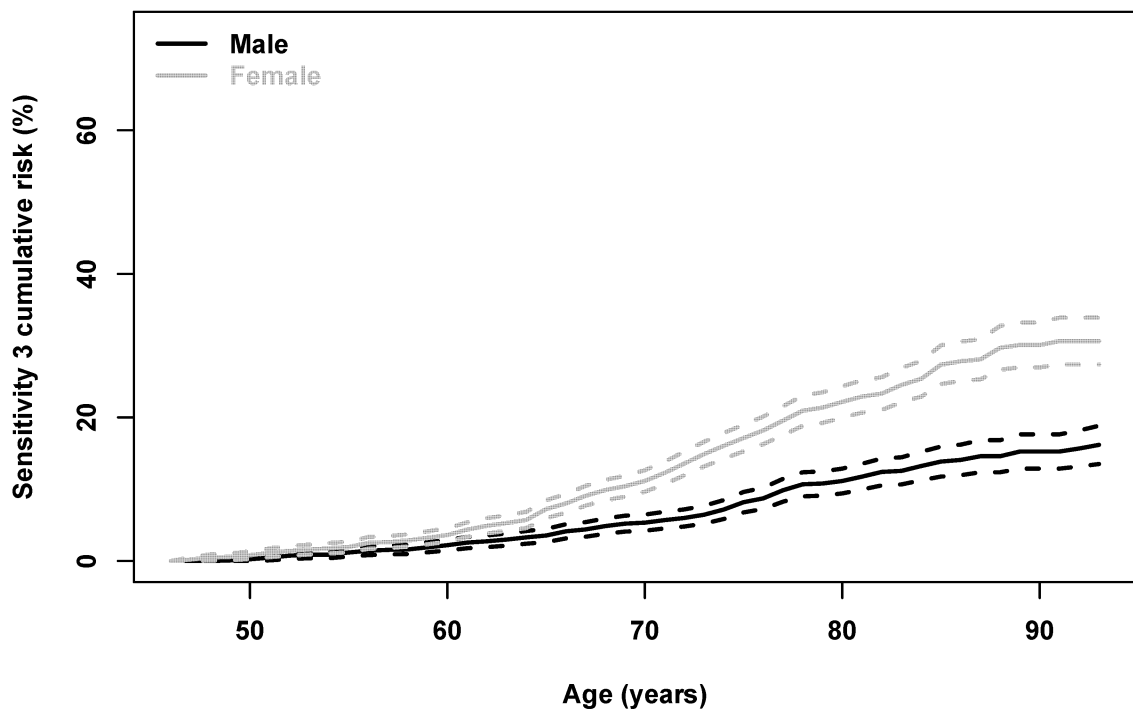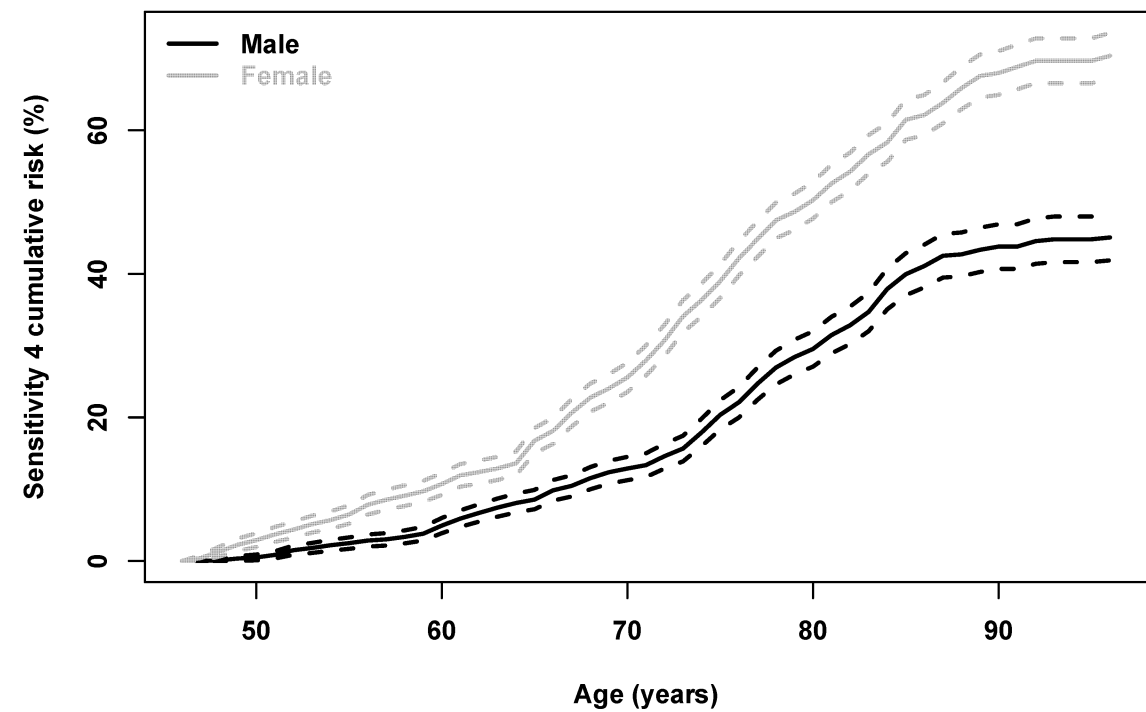

Supplement: CJN.00180115_CJN00180115SupplementaryData.pdf [file CJN.00180115_CJN00180115SupplementaryData.pdf]
